# Supplementary material for: Suppression of metal-to-insulator transition using strong interfacial coupling at cubic and orthorhombic perovskite oxide heterointerfaces
Source: Royal Society of Chemistry journal article supplement (doi:10.1039/d0nr07545k), 2020-12-09
Supplement: d0nr07545k1.pdf [file d0nr07545k1.pdf]

## Supplementary Information

### **Suppression of metal to insulator transition using strong interfacial coupling at cubic and orthorhombic perovskite oxide heterointerface**

Woonbae Sohn<sup>a,b</sup>, Taemin Ludvic Kim<sup>a</sup>, Tae Hyung Lee<sup>a</sup>, Sangmoon Yoon<sup>a</sup>, Chungsoo Kim<sup>c</sup>, Jung-Woo Yoo<sup>d</sup>, Kwang Chul Roh<sup>b,\*</sup>, Miyoung Kim<sup>a,\*</sup> and Ho Won Jang<sup>a,\*</sup>

<sup>a</sup>*Department of Materials Science and Engineering, Research Institute of Advanced Materials, Seoul National University, Seoul 08826, Republic of Korea.*

<sup>b</sup>*Energy Storage Materials Centre, Korea Institute of Ceramic Engineering and Technology, Jinju-si, Gyeongsangnam-do 52851, Republic of Korea.*

<sup>c</sup>*Technology of Analysis Centre, Korea Institute of Ceramic Engineering and Technology, Jinju-si, Gyeongsangnam-do 52851, Republic of Korea.*

<sup>d</sup>*School of Materials Science and Engineering, Ulsan National Institute of Science and Technology, Ulsan 44919, Republic of Korea*

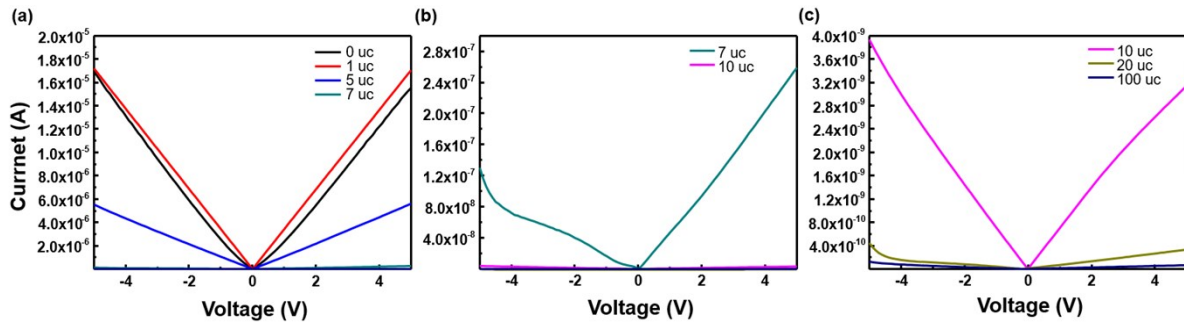

**Fig. S1.** I-V curves of the LAO/CTO/STO heterostructures with different CTO interlayer thicknesses: (a) 0 - 7 uc, (b) 7 and 10 uc, (c) 10 - 100 uc.

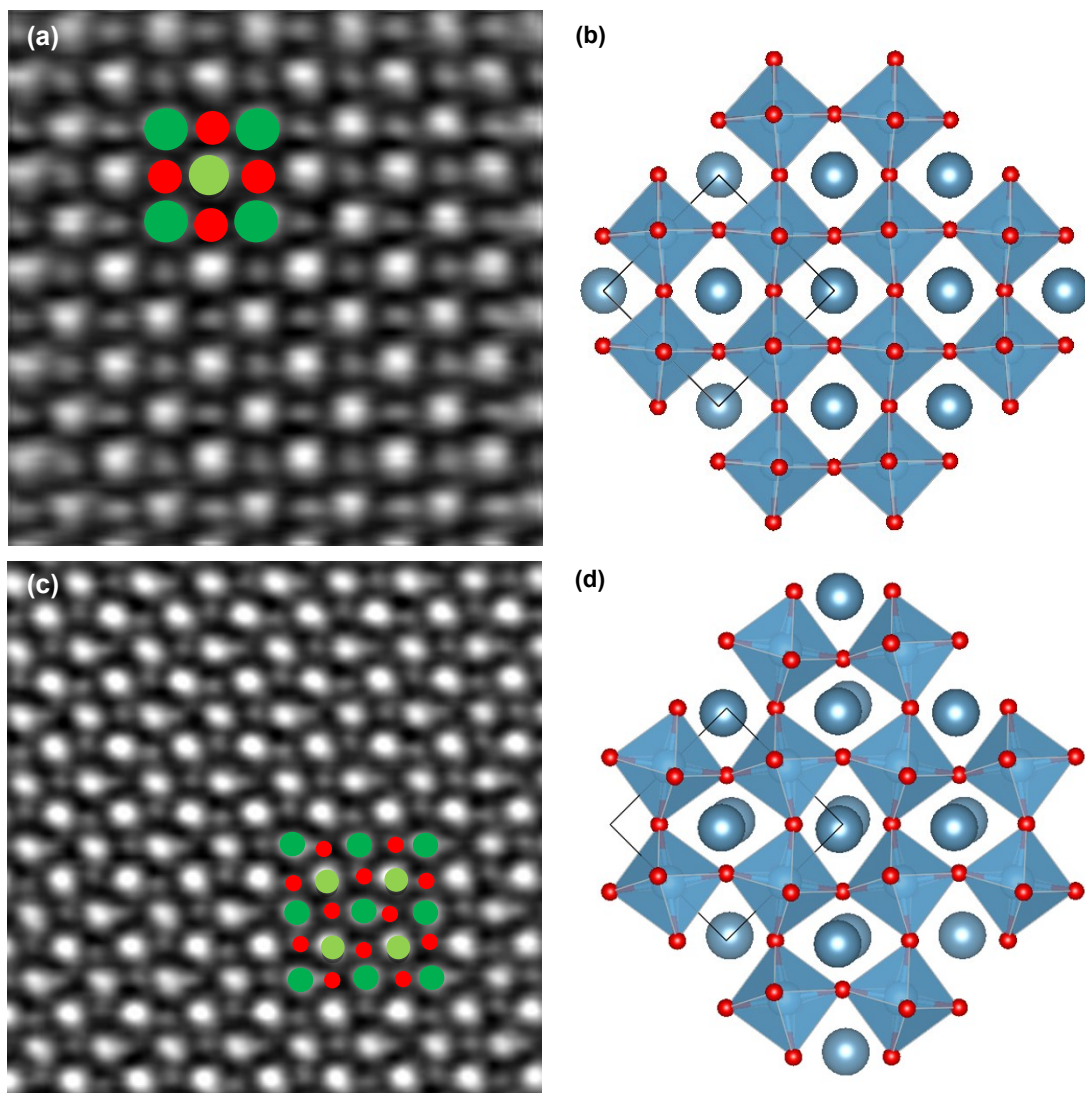

**Fig. S2.** (a) Magnified iDPC STEM image of the 5 uc CTO film in the zone axis of  $[100]_p$  with marked atom position. (b) Atomic model of 5 uc CTO film, showing near-cubic symmetry. (c) Magnified iDPC STEM image of the 24 uc CTO film in the zone axis of  $[100]_p$  with marked atom position. (d) Atomic model of 24 uc CTO film, showing orthorhombic symmetry.

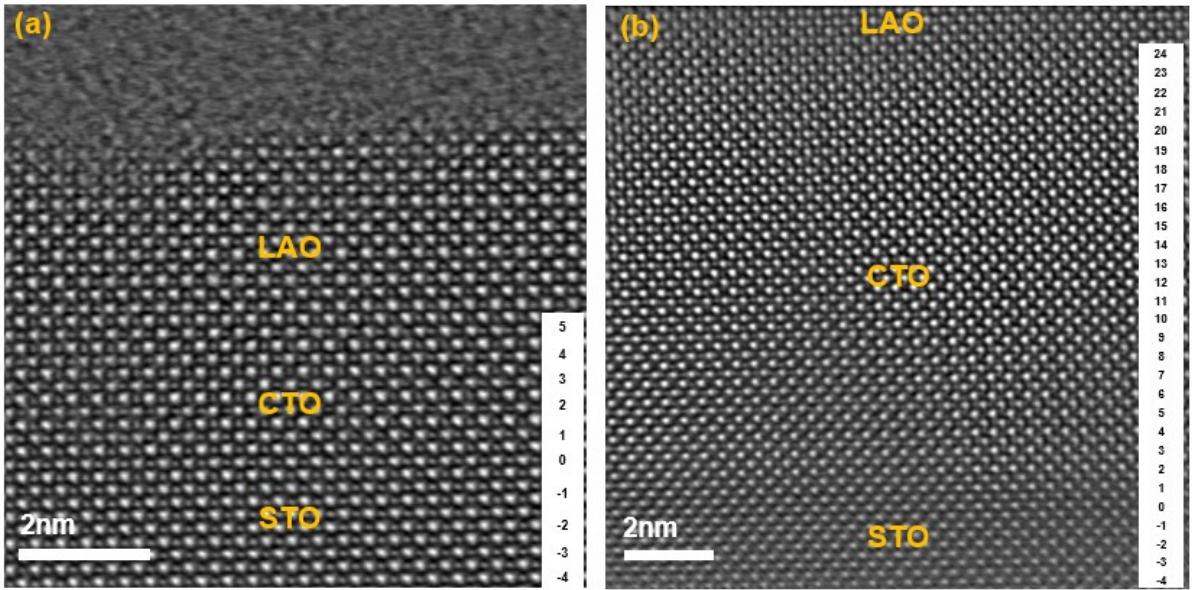

**Fig. S3.** iDPC STEM image of the (a) LAO/CTO (5 uc)/STO and (b) LAO/CTO (24 uc)/STO heterostructure with atomic row position at which Ti-O-Ti bonding angles are measured.
